# Supplementary material for: All polymeric conductive strain sensors with excellent skin adhesion, recovery, and long-term stability prepared from an anion–zwitterion based hydrogel
Source: Royal Society of Chemistry journal article supplement (doi:10.1039/d2ra07990a), 2023-01-01
Supplement: d2ra07990a1.pdf [file d2ra07990a1.pdf]

## Supplementary material

# **All polymeric conductive strain sensors with excellent skin adhesion, recovery, and long-term stability prepared from an anion–zwitterion based hydrogel**

*Goeun Lee<sup>a,b</sup>, Hyunsu Seo<sup>a</sup>, Daewoo Kim<sup>b</sup>, Seunghan Shin<sup>a,c</sup>, Kiok Kwon<sup>a\*</sup>*

<sup>a</sup>Green and Sustainable Materials R&D Department, Korea Institute of Industrial Technology (KITECH), Republic of Korea.

<sup>b</sup>Department of Chemical and Biomolecular Engineering, Yonsei University (YU), Seodaemun-gu, Seoul, 03722, Republic of Korea

<sup>c</sup>Department of Green Process and System Engineering, Korea University of Science & Technology (UST), Cheonan, Chungnam 31056, Republic of Korea

\* Correspondence to Kiok Kwon: [kioks@kitech.re.kr](mailto:kioks@kitech.re.kr)

| Hydrogel             |                      | AMPSs<br>(g) | VIPS<br>(g) | AAM<br>(g) | MBAA<br>(mL) | I2959<br>(g) | H <sub>2</sub> O<br>(mL) | Water contents<br>(%) |
|----------------------|----------------------|--------------|-------------|------------|--------------|--------------|--------------------------|-----------------------|
| P(AMPSs/VIPS-co-AAm) | MBAA 0.1 mol%        | 12           | 6           | 3.99       | 0.87         | 0.13         | 17                       | 60.0                  |
|                      | MBAA 0.15 mol%       | 12           | 6           | 3.99       | 1.30         | 0.13         | 17                       | 60.4                  |
|                      | MBAA 0.2 mol%        | 12           | 6           | 3.99       | 1.73         | 0.13         | 17                       | 60.9                  |
|                      | AMPSs/VIPS :AAM =2:1 | 12           | 6           | 2.33       | 1.03         | 0.1          | 15                       | 60.7                  |
|                      | AMPSs/VIPS :AAM =1:1 | 12           | 6           | 3.99       | 1.30         | 0.13         | 17                       | 60.4                  |
|                      | AMPSs/VIPS :AAM =1:2 | 12           | 6           | 7.98       | 1.95         | 0.19         | 22                       | 60.1                  |
| P(AMPSs-co-AAm)      | AMPSs :AAM =1:1      | 12           | 0           | 1.86       | 0.15         | 0.06         | 6                        | 60.8                  |

**Table S1.** Recipes for all hydrogel sample according to the monomer molar ratio.

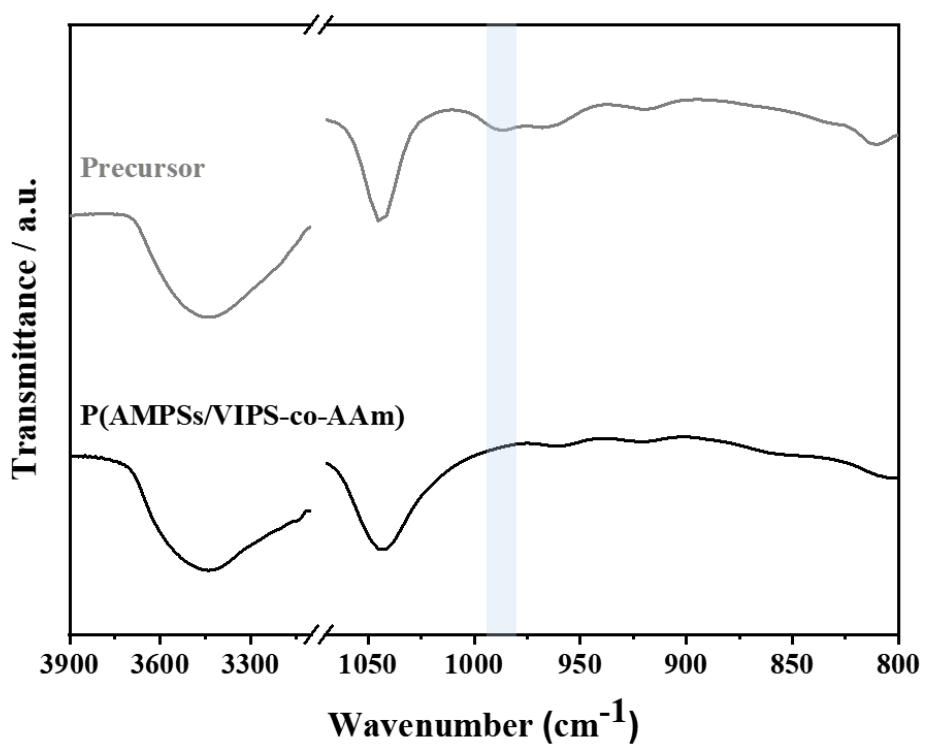

**Fig. S1.** FTIR spectra of the carbon double bond peak conversion after curing.

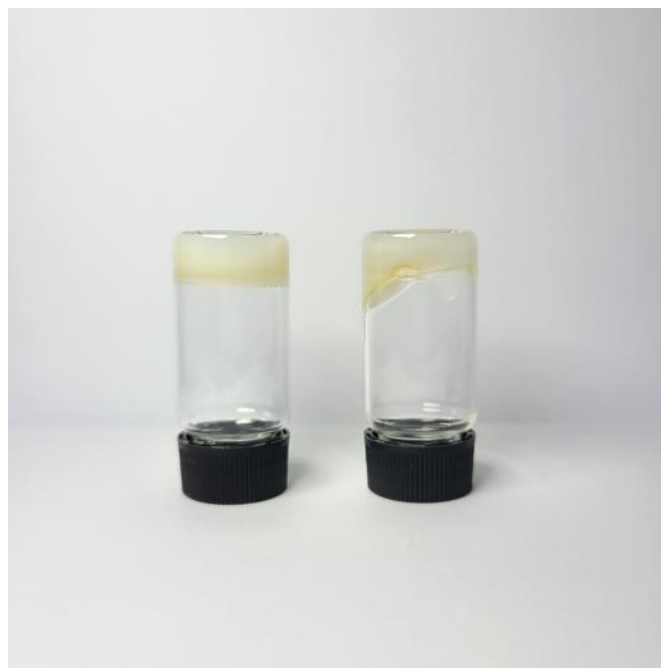

**Fig. S2.** Photographs of cured P(AMPSs/VIPS-co-AAm) hydrogel (left) and less cured P(AMPSs/VIPS) hydrogel (right).

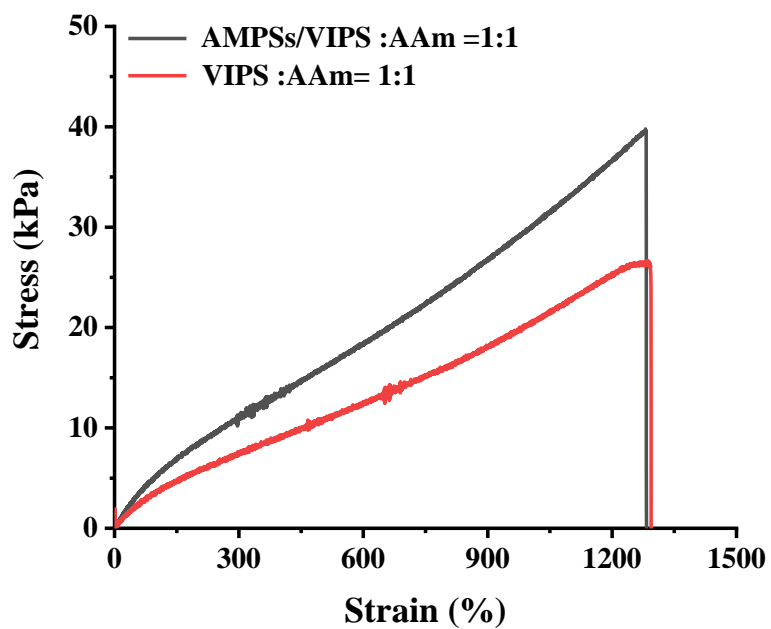

**Fig. S3.** Compare tensile curve of P(AMPSs/VIPS-co-AAm) hydrogel and P(VIPS-co-AAm) hydrogel.

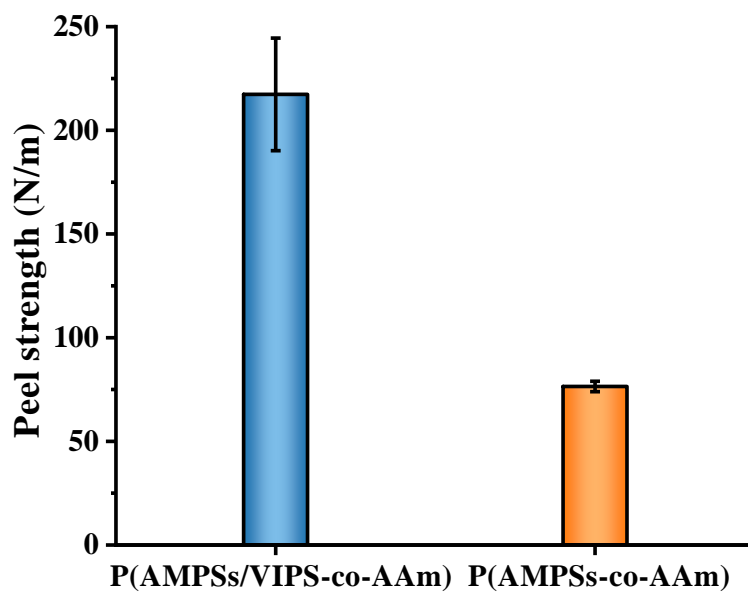

**Fig. S4.** Compare 90° peel strength of P(AMPSs/VIPS-co-AAm) hydrogel and P(AMPSs-co-AAm) hydrogel.

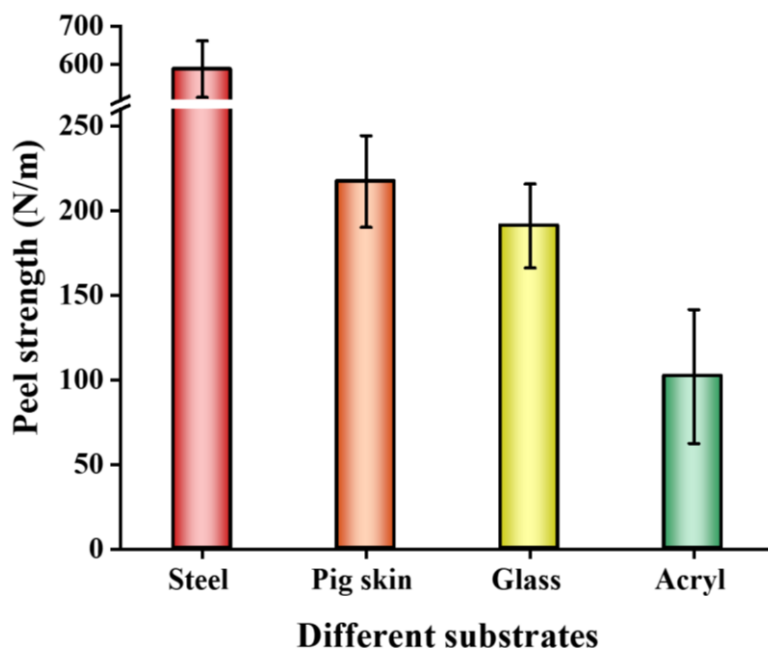

**Fig. S5.** 90° Peel strength of the P(AMPSs/VIPS-co-AAm) hydrogel on various materials.

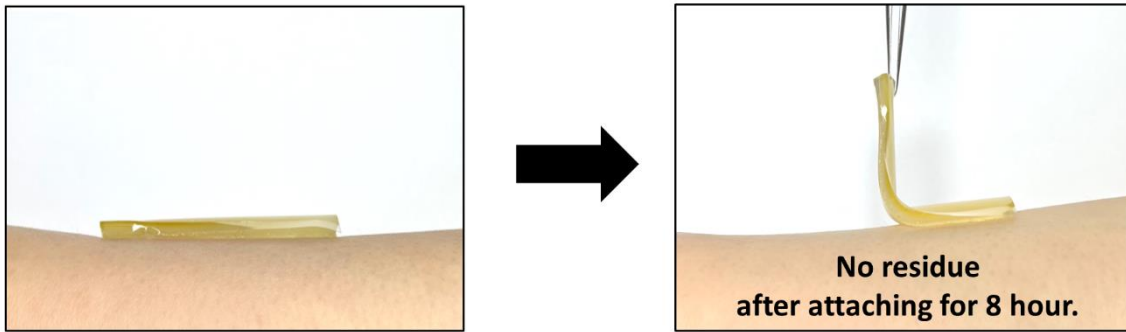

**Fig. S6.** Photographs of no residue left after 8 hours of attachment to the human skin.

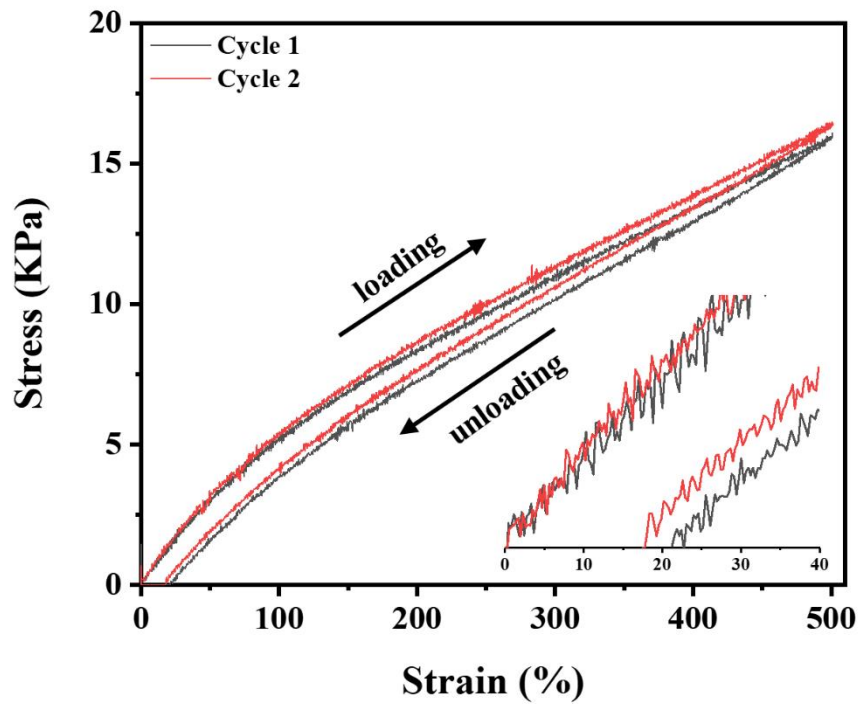

**Fig. S7.** The first and second loading-unloading cycle at 500% strain.

**a**

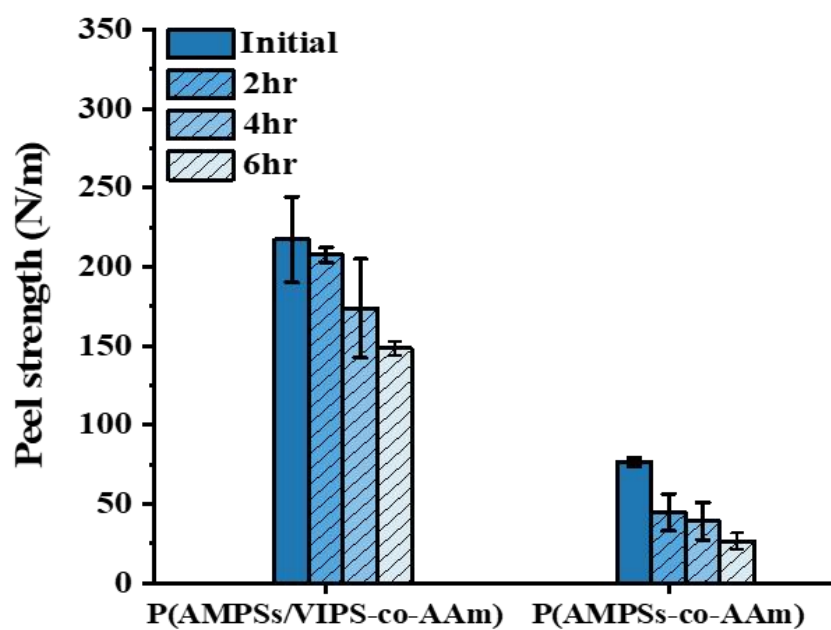

**b**

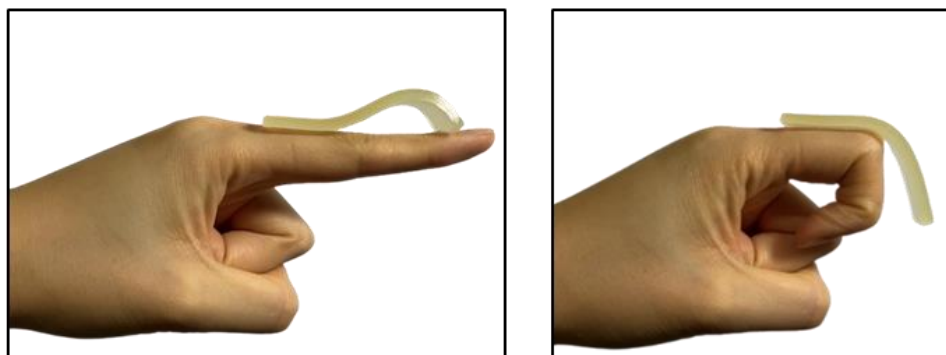

**Fig. S8.** Comparison of 90° peel strength between P(AMPSs/VIPS-co-AAm) and P(AMPSs-co-AAm) hydrogel according to time exposed to air. (b) Photographs of the P(AMPSs-co-AAm) Hydrogels that do not adhere well to the skin while bending the fingers.

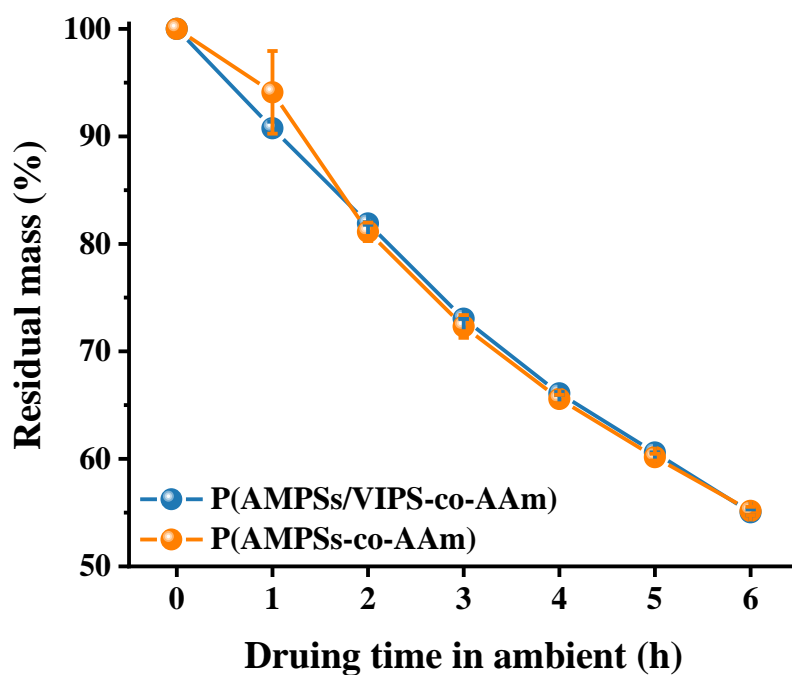

**Fig. S9.** Cut it into 1 x 1 (cm<sup>2</sup>) size and measure the water contents in the ambient state. Comparison of water contents between P(AMPSs/VIPS-co-AAm) and P(AMPSs-co-AAm) hydrogel.

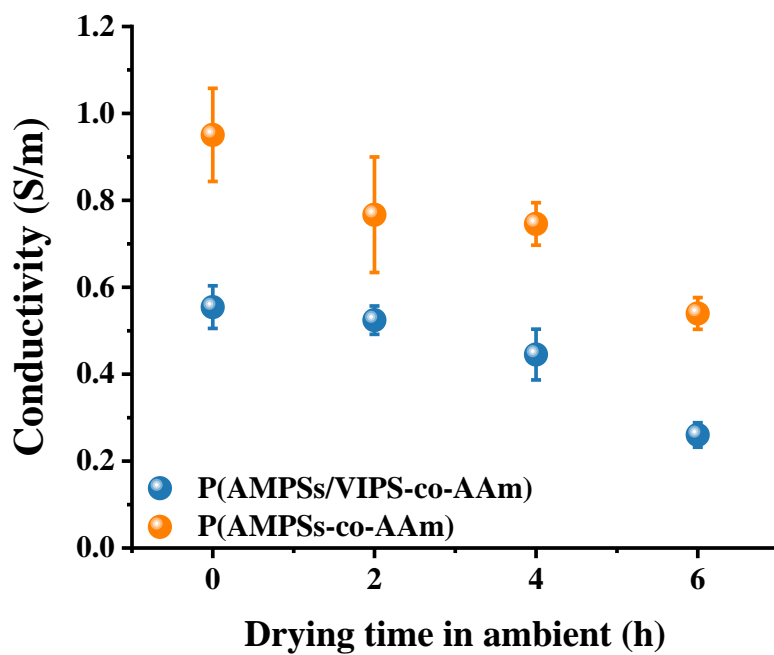

**Fig. S10.** Comparison of ionic conductivity between P(AMPSs/VIPS-co-AAm) and P(AMPSs-co-AAm) hydrogel according to time exposed to air.
